# Supplementary material for: Transcription of follicle-stimulating hormone subunit genes is modulated by porcine LIM homeobox transcription factors, LHX2 and LHX3
Source: PubMed Central journal article supplement — J Reprod Dev. 2016 Feb 8;62(3):241–8. doi: 10.1262/jrd.2015-163 (PMC4919287; doi:10.1262/jrd.2015-163), 2016-02-08
Supplement: jrd-62-241-s001.pdf [file jrd-62-241-s001.pdf]

## Supplementary Table 1.

### List of primers used for real-time PCR

Real-time PCR was performed using a primer set in which the reverse primers for *Lhx3a* and *Lhx3b* were common. *Lhx3a* and *Lhx3b* were quantified using the nested PCR method. An aliquot of the 1st PCR products with the 1st PCR primer set was re-amplified by 2nd PCR and cyclophilin primer sets.

| Set     | Gene         | Forward primer                    | Reverse primer                  |
|---------|--------------|-----------------------------------|---------------------------------|
| 1st PCR | <i>Lhx3a</i> | 5' -GAGCTGGCGGGCGACCGAGATCGG-3'   | 5' -GCTGAAGCAGCGCTCGGCCAGCG-3'  |
|         | <i>Lhx3b</i> | 5' -AGCTGGGCCCCAGCCGGGAGTC-3'     |                                 |
| 2nd PCR | <i>Lhx3a</i> | 5' -GCAGCCGCCGCTGTCTGCACCTTACG-3' | 5' -GGCGTGTGGCAGTCACTGCACTTG-3' |
|         | <i>Lhx3b</i> | 5' -TGCTGGCGCTGCTGGCGGGAG-3'      |                                 |
| -       | Cyclophilin  | 5' -ATGATGAGAATTTTATCCTGAAGCA-3'  | 5' -CTGGCAGTGCAAATGAAAACTG-3'   |

### Supplementary Fig. 1.

```

10      20      30      40      50      60      70      80      90      100     110     120
ATGCTGCTGGAACGGAGCTGGCGGGGACCGAGATCGGGCCGGGGCCCGCAGCCGCGCTGTCTGCACCTTAGCGGGACTCGGGAGATCCGACTGTGTGCCGGCTGCGACCAGCAC
M L L E T E L A G D R D R P G A P A A A A V C T L R G T R E I P L C A G C D Q H

130     140     150     160     170     180     190     200     210     220     230     240
ATCCTGGACCGCTTCATCCTCAAGGCTCTGGACCGCCACTGGCACAGCAAGTGCCTCAAGTGCAGTGAAGTGCACACGCCGCTGGCCGAGCGCTGCTTCAAGCCGGAGAGAGCCTCTAC
I L D R F I L K A L D R H W H S K C L K C S D C H T P L A E R C F S R G E S L Y

250     260     270     280     290     300     310     320     330     340     350     360
TGCAAGGACGACTTCTTCAAGCGCTTCGGGACCAAGTGCAGCCGCGTGCAGCTGGGCATCCCGCCACGAGGTGGTGCGCCGCGCCAGGACTTCGTGTACCACCTGCACTGCTTCCG
C K D D F F K R F G T K C A A C Q L G I P P T Q V V R R A Q D F V Y H L H C F A

370     380     390     400     410     420     430     440     450     460     470     480
TGGCTCGTGTGCAAGCGGCAGCTGGCCACGGGCGACGAGTCTACCTCATGGAGGACAGCCGGCTCGTGTGCAAGCCGACTACGAGACCGCAAGCAGCGAGAGCCGAGGCCACGGCC
C V V C K R Q L A T G D E F Y L M E D S R L V C K A D Y E T A K Q R E A E A T A

490     500     510     520     530     540     550     560     570     580     590     600
AAGCGGCCGCGCACGACCATCACGGCCAGCAGCTGGAGACGCTGAAGAGCGCCTACAACACGTCGCCCAAGCCCGCGCCACGTCGCGGAGCAGCTCTCCTCCGAGACCGGCCTGGAC
K R P R T T I T A K Q L E T L K S A Y N T S P K P A R H V R E Q L S S E T G L D

610     620     630     640     650     660     670     680     690     700     710     720
ATGCGCGTGTGCAAGTGTGGTTCAGAACCGCCGGGCCAAGAAAAGCGGCTCAAGAAGGACGCCGGCCGCGAGCGCTGGGGCCAGTACTTTCGTAACATGAAGCGCCCGCGGTTGGC
M R V V Q V W F Q N R R A K E K R L K K D A G R Q R W G Q Y F R N M K R A R G G

730     740     750     760     770     780     790     800     810     820     830     840
TCCAAGTCGGACAAGGACAGCGTCCAGGAGGAGGGGACAGTGCAGCCGAGGTTCTCCTTACAGAGGACATCCATGGCCGAAATGGGCCTGCCAACGGCCTCTACGGCGGCTG
S K S D K D S V Q E E G Q D S D A E V S F T D E P S M A E M G P A N G L Y G G L

850     860     870     880     890     900     910     920     930     940     950     960
GGGGAGCCTGCCCTGCCTTGGGCCGGCCCTCGGGGGCCCGGGCAGCTTCCCGCTGGAGCACGGAGGCTGGCGGGCCCGGAGCAGTATGGAGAGCTGCGCCCAGCAGCCCTACGGT
G E P A P A L G R P S G A P G S F P L E H G G L A G P E Q Y G E L R P S S P Y G

970     980     990     1000    1010    1020    1030    1040    1050    1060    1070    1080
GTCCCCTCGTCCGCCCGCCCTGCAGAGCCTCCTTGGCCCCAGCCCTCCTCTCCAGCTTGGTGTACCCGGAGGCTGGCTTGGGGCTTGCCCGCGGGACGCCAGGTGGGCCCCCA
V P S S P A A L Q S L L G P Q P L S S L V Y P E A G L G L V P A G A P G P P

1090    1100    1110    1120    1130    1140    1150    1160    1170    1180    1190    1200
CCCATGAGGGTGTGGCAGGGAACGGACCCAGCTCCGACCTATCCAGGGGAGCAGTGGGGGCTACCCGACTTCCCTGCCAGTCCCGCCTCCTGGCTGGACGAGGTGGATCACGCTCAG
P M R V L A G N G P S S D L S T G S S G G Y P D F P A S P A S W L D E V D H A Q

1210    1220    1230    1240    1250    1260    1270    1280    1290    1300    1310    1320
TTCTGACTGAGGCCAGCTCCGTGGAGCACCAGACACGAGCACTGCCCTGGCTGGTGGTGGTGGGAGCCGCTCTCCTTCCGAAGCCCTGGGCCTCTAAAGGACACAGGGTCACCG
F *

1330    1340    1350    1360    1370    1380    1390    1400    1410    1420    1430    1440
GCGGGCACAGGCTGAGGACTGTCCAGCCCGCGGCCCTGGCCCGGGCAGAGGACTTTCTCCGGTCTCGAGGCTCCTTCTGGGACAAGGGGAGCCACCTGGTGGCTGCTCAGCAAGC

1450    1460    1470    1480    1490    1500    1510    1520    1530    1540    1550    1560
CTTGTTTTGTAAAGCAGATTCTCCCTTATCAACAAAATTAAGTGAAGTGTGCTGCTCTTTCTAGACCGGAGTGGTCAGCCCCGAAGCCGGGGAGGGGGCTCTCCCAGCCCAGAG

1570    1580    1590    1600    1610    1620    1630    1640    1650    1658
CAGCACAGCCCTCAGACTGGAAGATGCTTTAATTTTAAAAATAAAAAATAATACGAACTGTGCTTCCATTTCCAGCTTCTCTGTCTAGTTCTGCC

```

Nucleotide and amino acid sequences of porcine *Lhx3a*

The determined sequence was compared with two partial sequences of porcine *Lhx3a* (AF370445.1) and *Lhx3* (AF063245.1). Differences in nucleotides and in amino acids are indicated with red letters. Nucleotide numbers are indicated above the sequence. Shaded amino acid sequences indicate domain regions in the order of LIM1 (nucleotide number (nn): 100–252), LIM2 (nn: 277–438), and DNA-binding homeodomain (nn: 478–657) are shaded.

Supplementary Fig. 2.

Nucleotide and amino acid sequences of porcine *Lhx3b*

```

10      20      30      40      50      60      70      80      90      100     110     120
ATGGAAGCGCGCGGGAGCTGGGCCCCAGCGGGAGTCGGCGGGCGGCACCTGCTGCTGGCGCTGCTGGCGCGGAGGGAGGACCTGCGCCGAGAGATCCCACTGTGTGCCGGCTGCGAC
M E A R G E L G P S R E S A G G D L L L A L L A R R E D L R R E I P L C A G C D
130     140     150     160     170     180     190     200     210     220     230     240
CAGCACATCCTGGACCGCTTCATCCTCAAGGCTCTGGACCGCCACTGGCACAGCAAGTGCCTCAAGTGCACTGCCACACGCCGCTGGCCGAGCGCTTTCAGCCGGAGAGAGC
Q H I L D R F I L K A L D R H W H S K C L K C S D C H T P L A E R C F S R G E S
250     260     270     280     290     300     310     320     330     340     350     360
CTCTACTGCAAGGACGACTTCTTCAAGCGCTTCGGGACCAAGTGGCGCGCGTGCCAGCTGGGCATCCCGCCACGAGGTGGTGGCGCGGCCAGGACTTCGTGTACCACCTGCACTGC
L Y C K D D F F K R F G T K C A A C Q L G I P P T Q V V R R A Q D F V Y H L H C
370     380     390     400     410     420     430     440     450     460     470     480
TTCGCCTGCGTCGTGTGCAAGCGGCAGCTGGCCACGGCGACGAGTTCTACCTCATGGAGGACAGCCGGCTCGTGTGCAAGGCCGACTACGAGACCCCAAGCAGCGAGAGGCCGAGGCC
F A C V V C K R Q L A T G D E F Y L M E D S R L V C K A D Y E T A K Q R E A E A
490     500     510     520     530     540     550     560     570     580     590     600
ACGGCCAAGCGCGCGCACGACCATCACGGCCAAGCAGCTGGAGACGCTGAAGAGCGCCTACAACACGTGCGCCAAGCCCGCGCGCCACGTGCGCGAGCAGCTCTCCTCCGAGACCGGC
T A K R P R T T I T A K Q L E T L K S A Y N T S P K P A R H V R E Q L S S E T G
610     620     630     640     650     660     670     680     690     700     710     720
CTGGACAIGCGCGICGIGCAGGIGIGGICCCAGAACCAGCGGGCCAAAGGAAAGCGGCTCAAGAAAGACCGCGCGCGCCAGCGCIGGGGCCAGIACIICGIAACAIGAAAGCGCGCCCGC
L D M R V V Q V W F Q N R R A K E K R L K K D A G R Q R W G Q Y F R N M K R A R
730     740     750     760     770     780     790     800     810     820     830     840
GGTGGCTCCAAGTCGGACAAGGACAGCGTCCAGGAGGAGGGGACAGTACGCGGAGGTCTCCTTACAGACAGGCCATCCATGGCCGAAATGGGCCCTGCCAACGGCCTCTACGGC
G G S K S D K D S V Q E E G Q D S D A E V S F T D E P S M A E M G P A N G L Y G
850     860     870     880     890     900     910     920     930     940     950     960
GGCCTGGGGAGCCTGCCCTGCCTTGGGCCGGCCCTCGGGGGCCCGGGCAGCTTCCCGCTGGAGCAGGAGGCTGGCGGGCCCGGAGCAGTATGGAGAGCTGCGCCCCAGCAGCCCC
G L G E P A P A L G R P S G A P G S F P L E H G G L A G P E Q Y G E L R P S S P
970     980     990     1000    1010    1020    1030    1040    1050    1060    1070    1080
TACGGTGTCCCCTCGTGGCCCGCGCCCTGCAGAGCCTCCCTGGCCCCAGCCCTCCTCTCCAGCTTGGTGTACCCGGAGGCTGGCTTGGGGCTTGTGCCCGGGGAGCCCCAGGTGGG
Y G V P S S P A A L Q S L P G P Q P L L S S L V Y P E A G L G L V P A G A P G G
1090    1100    1110    1120    1130    1140    1150    1160    1170    1180    1190    1200
CCCCACCCATGAGGGTGTGGCAGGGAACGGACCCAGCTCCGACCTATCCACGGGAGCAGTGGGGGTACCCCGACTTCCCTGCCAGTCCCGCCTCCTGGCTGGACGAGGTGGATCAC
P P P M R V L A G N G P S S D L S T G S S G G Y P D F P A S P A S W L D E V D H
1210    1220    1230    1240    1250    1260    1270    1280    1290    1300    1310    1320
GCTCAGTTCTGACTGAGGCCCCAGCTCCGTGGAGCACCAGACAGCACTGCCCTGGCTGGGTGGTGGGAGCCGCGCTCTCCTTTCCCGAAGCCCTGGGCCTCTAAGGACACAGGG
A Q F *
1330    1340    1350    1360    1370    1380    1390    1400    1410    1420    1430    1440
TCACCGCGGGGCACAGGCTGAGGACTGTCCAGCCCGGGCGCCCTGGCCCCGGGACAGGGACTTTCTCCGGTCTCGAGGCTCCTTCTGGGACAAGGGGAGCCACCTGGTGGCTGCTCA
1450    1460    1470    1480    1490    1500    1510    1520    1530    1540    1550    1560
GCAAGCCTTGTGTTTAAAGCAGATTCCCTTTATCAACCAAAATTAAGTGTGCTGCTCTTTAGACCGGAGTGGTCAAGCCCGAAGCCGGGAGGGGGGCTCTCCCAAG
1570    1580    1590    1600    1610    1620    1630    1640    1650    1660
CCAGAGCAGCAGCCCTCAGACTGGAAGATGCTTTAATTTTTAAATTAATAAATAACGAACTGTGCTTCCATTTCCAGCTTCTCTGTAGTTCTGCC

```

The determined sequence was compared with two partial sequences of porcine *Lhx3b* (AF370450.1) and *Lhx3* (AF063245.1). Differences in nucleotides and in amino acids are indicated with red letters. Nucleotide numbers are indicated above the sequence. Shaded amino acid sequences indicate domain regions in the order of LIM1 (nucleotide number (nn): 106–258), LIM2 (nn: 283–444), and DNA-binding homeodomain (nn: 484–663) are shaded.

Supplementary Fig. 3A. Yoshida *et al.*

**A**

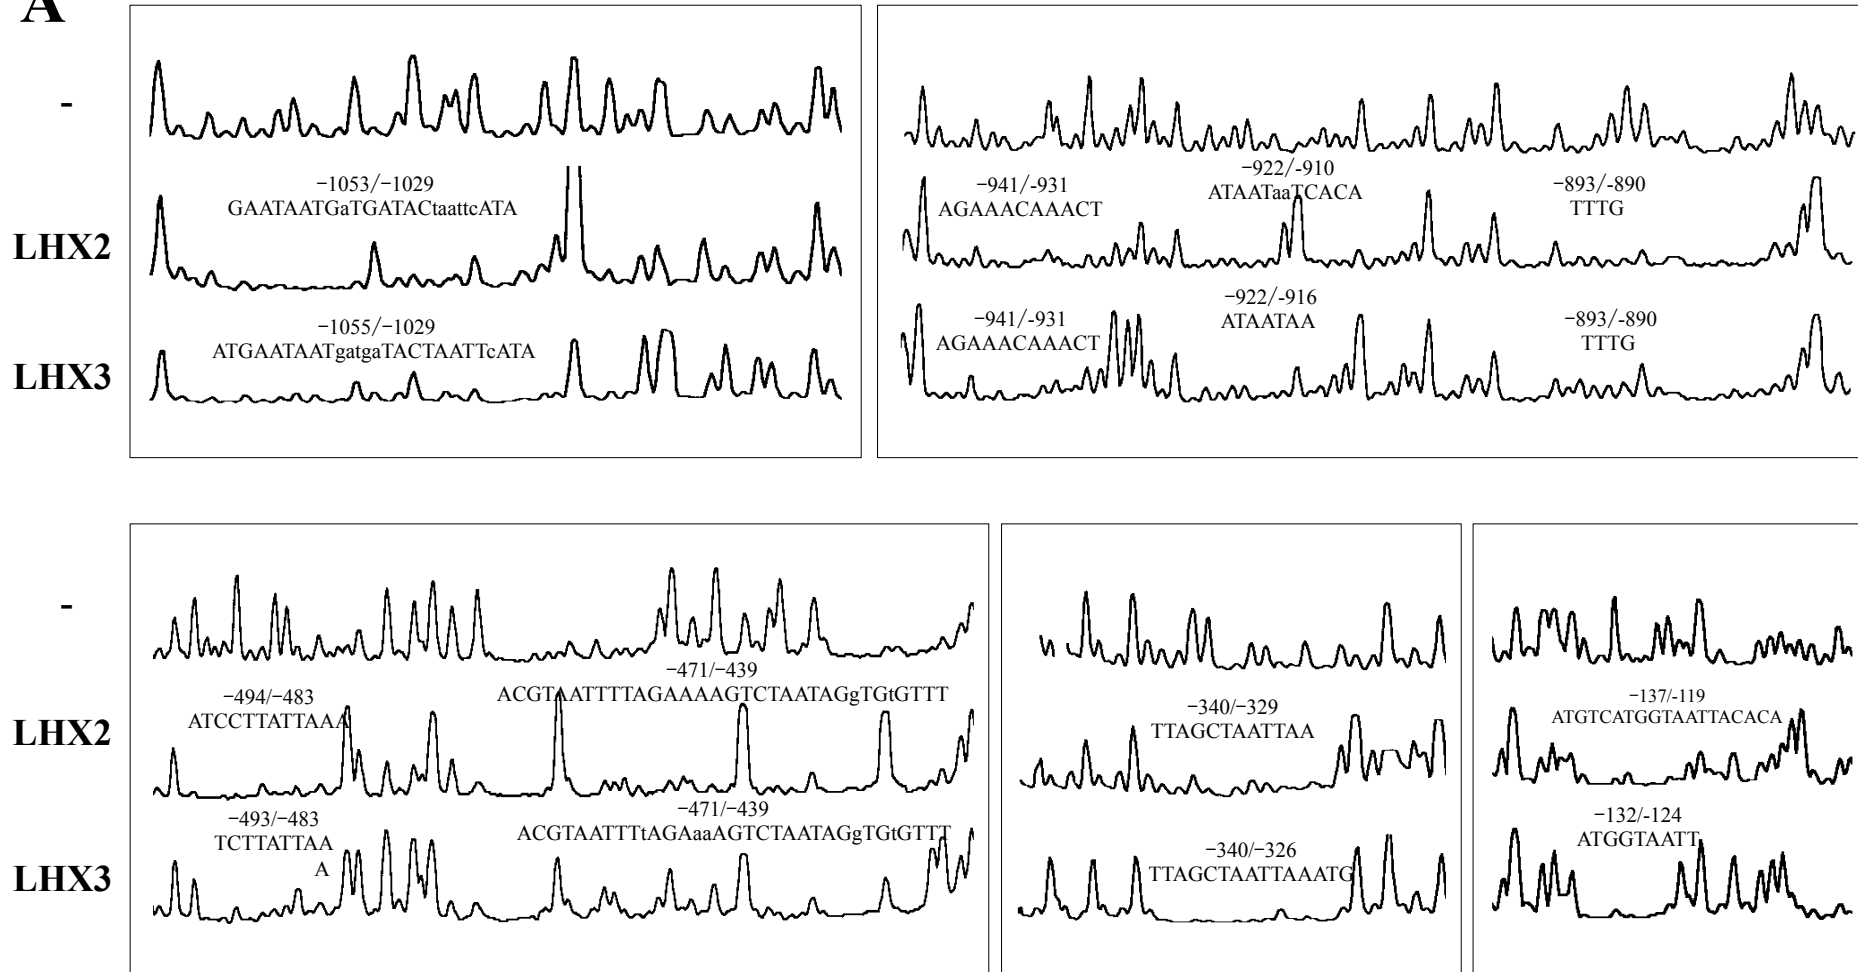

Supplementary Fig. 3B. Yoshida *et al.*

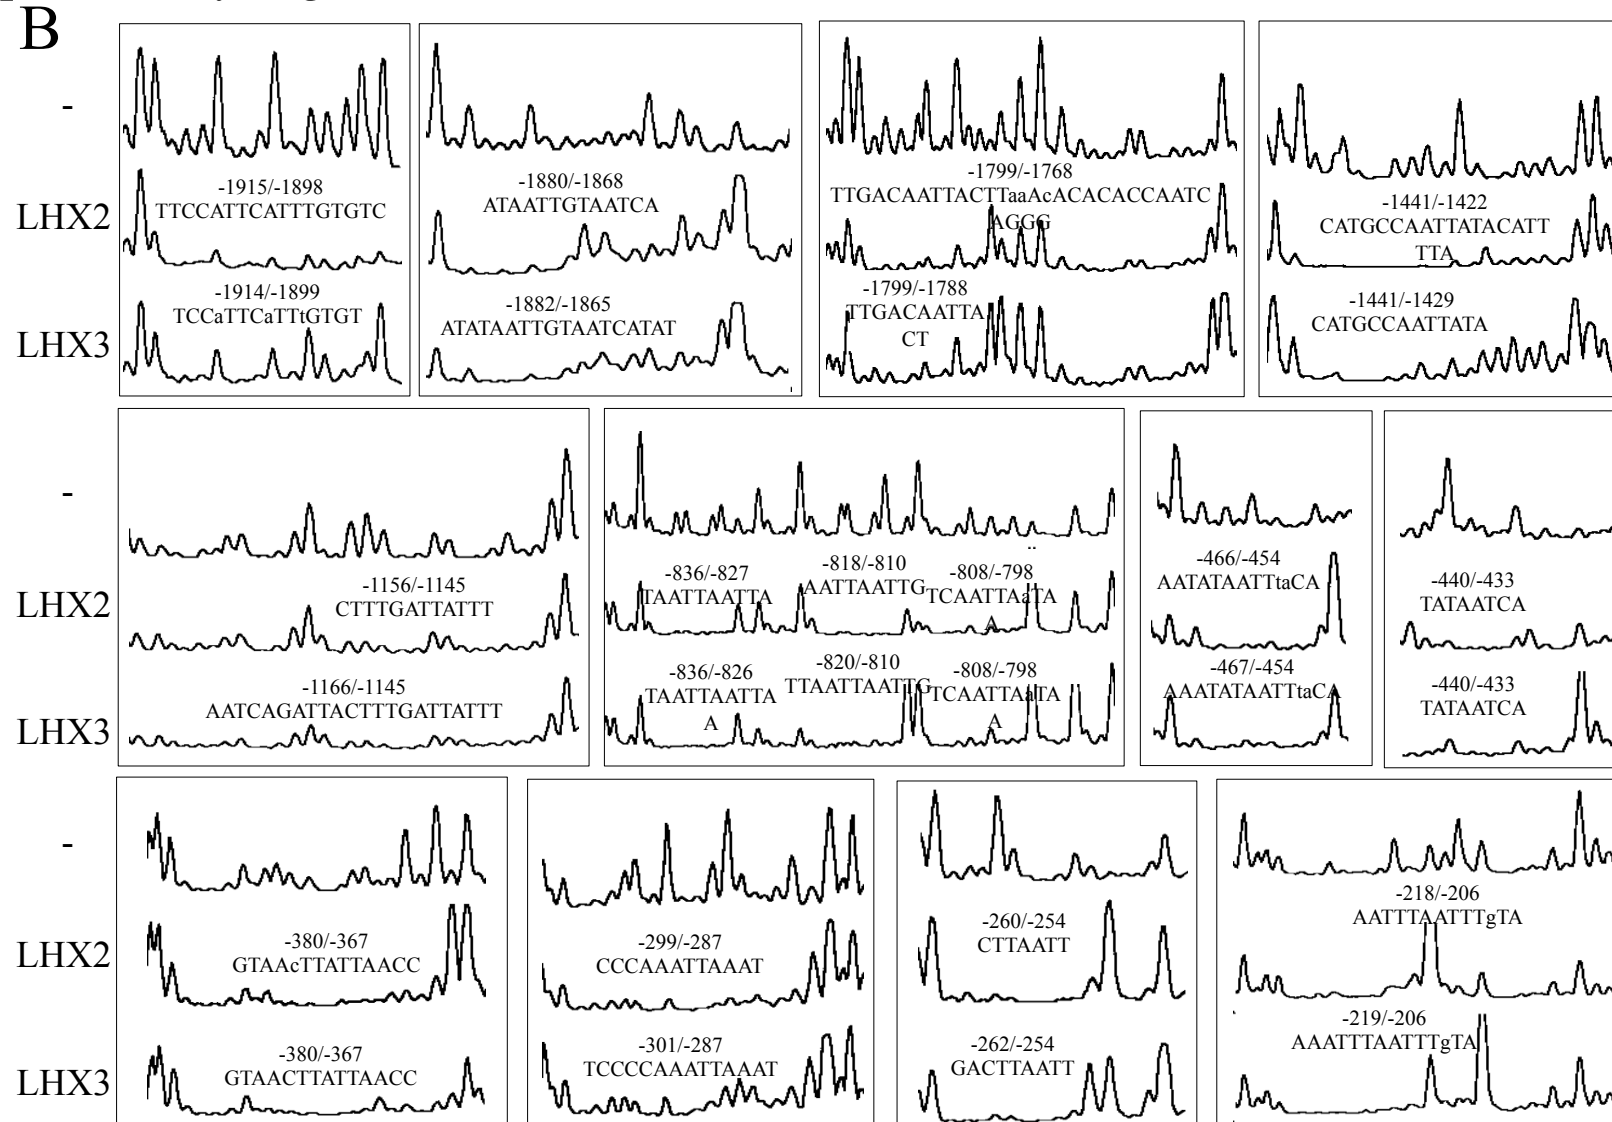

Supplementary Fig. 3. DNase I footprinting analysis of LHX2- and LHX3-binding sequences in the *Cga* and *Fshβ* promoter regions. Labeling of fragments of *Cga* (A) and *Fshβ* (B) were performed by PCR using a FAM-labeled forward primer [26]. DNase I digestion was performed without (-; upper panel) or with recombinant porcine  $\Delta$ LIM-LHX2 (LHX2; middle panel) or  $\Delta$ LIM-LHX3 (LHX3; lower panel) as described in the Materials and Methods, followed by analysis using a capillary sequencer with a GeneScan system. Numbers indicate the binding region. The nucleotides with decreased (uppercase) and unchanged (lowercase) their signals are indicated.
